# Supplementary material
Source: PubMed Central journal article supplement (PMC6374764)

# Non-responder vs. Responder

## ZWANG\_CLASS\_1\_TRANSIENTLY\_INDUCED\_BY\_EGF

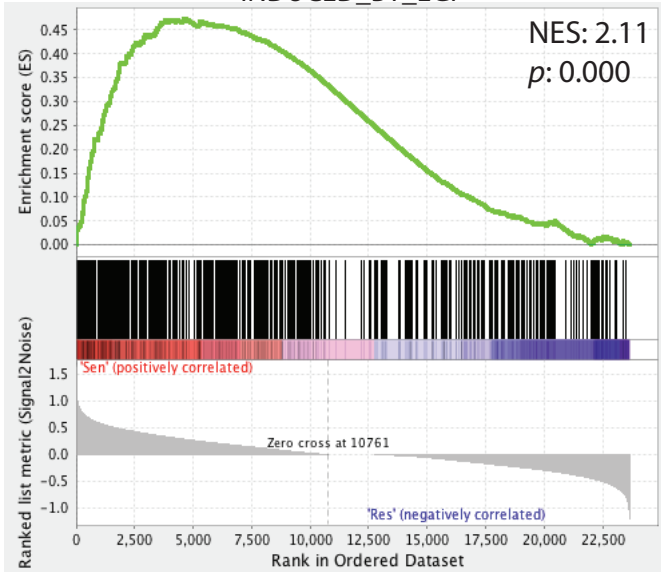

## BIOCARTA\_EGF\_PATHWAY

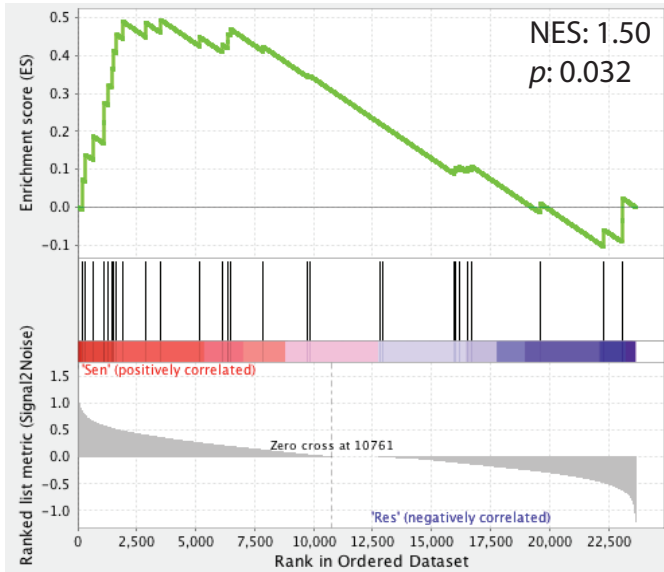

## REACTOME\_SIGNALING\_BY\_EGFR\_IN\_CANCER

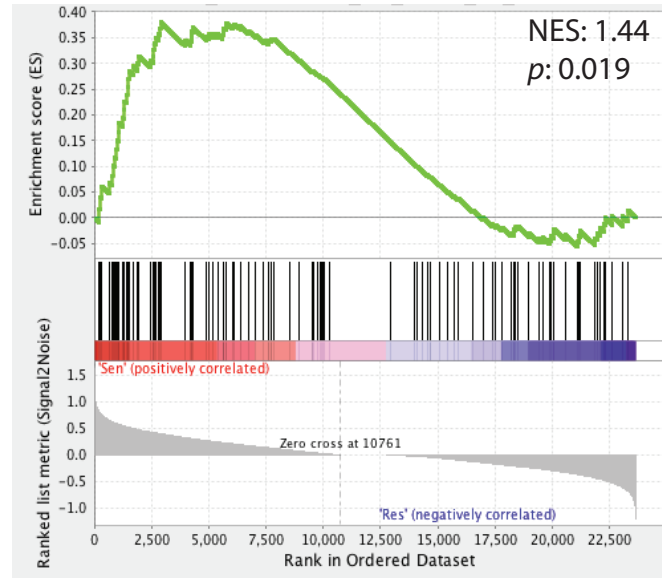

Supplement: noy105_suppl_supplementary_figure_2.pdf [file noy105_suppl_supplementary_figure_2.pdf]
