# Supplementary material
Source: PubMed Central journal article supplement (PMC6374764)

A

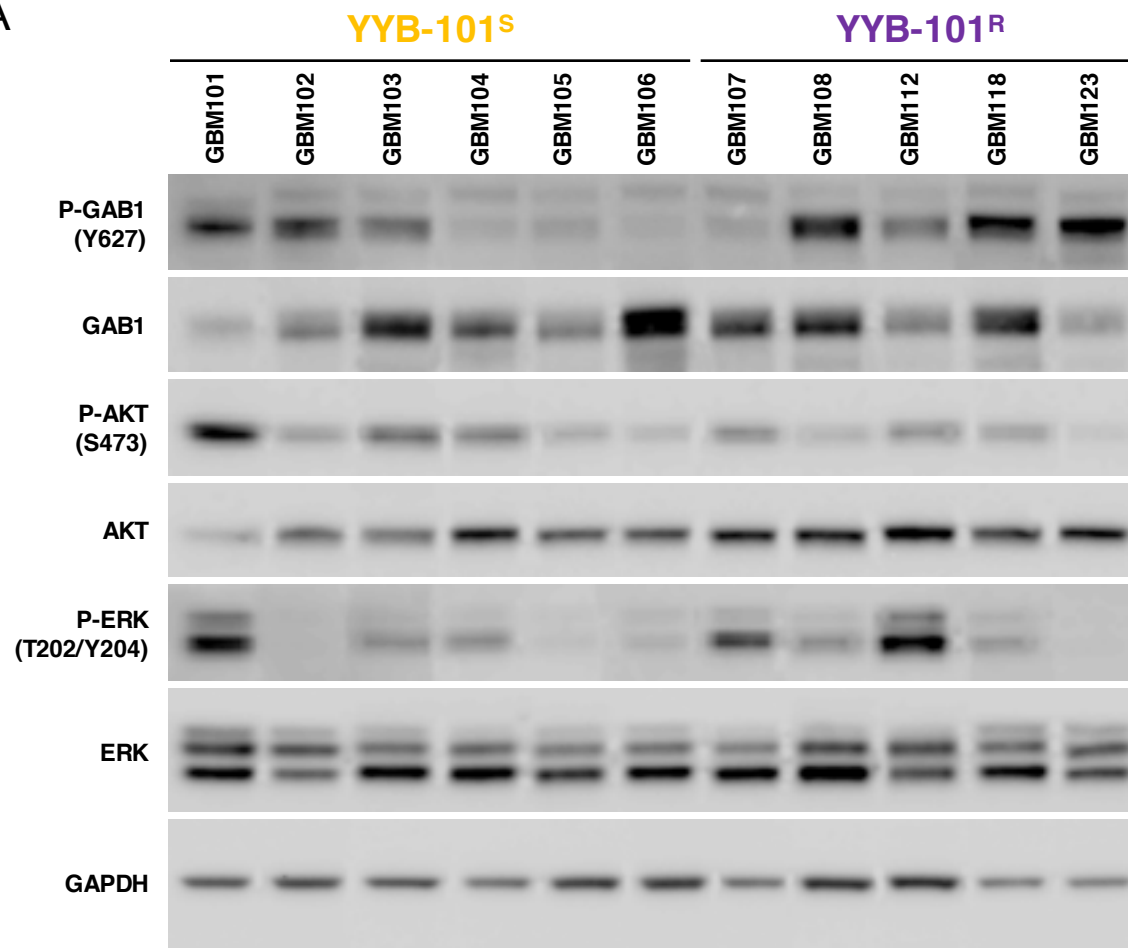

B

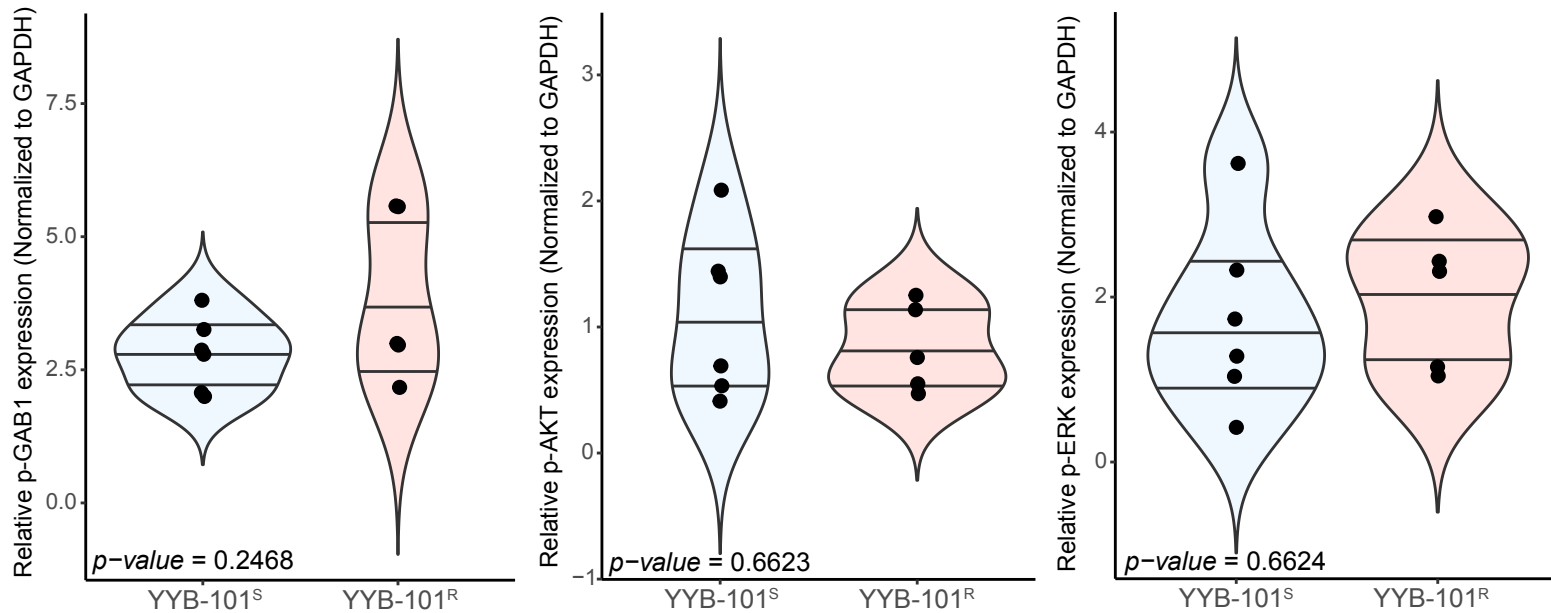

Supplement: noy105_suppl_supplementary_figure_1.pdf [file noy105_suppl_supplementary_figure_1.pdf]

**TCGA GBM Patient Survival (RNA-Seq)**

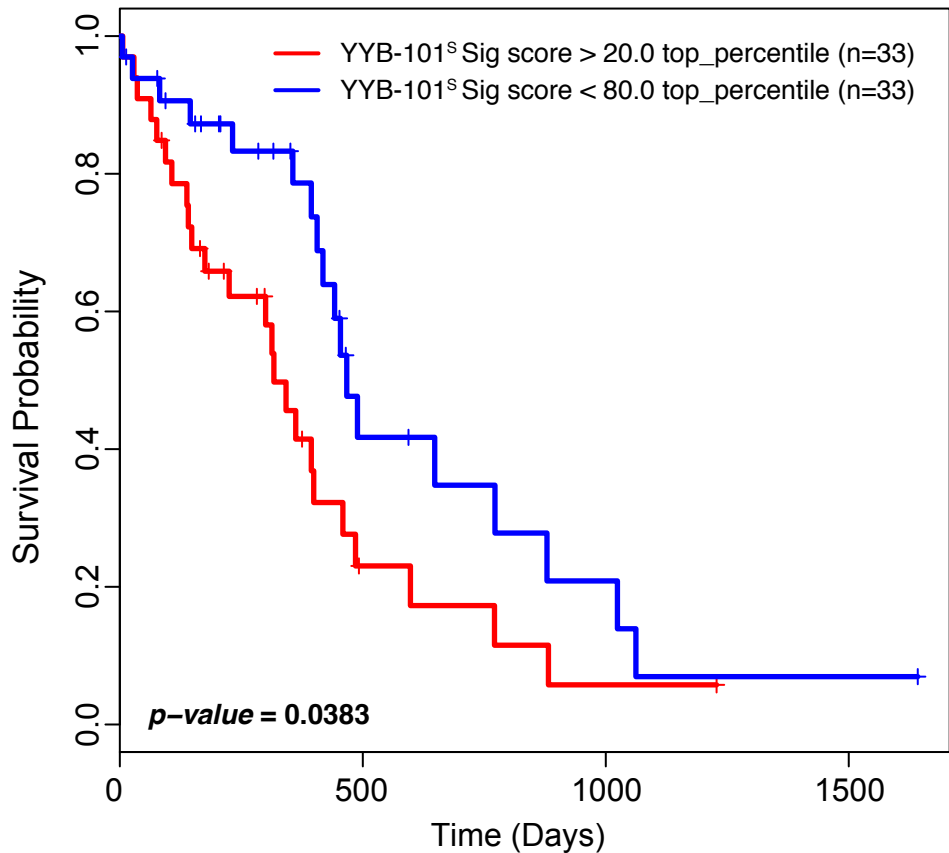

**TCGA GBM Patient Survival (HU133A)**

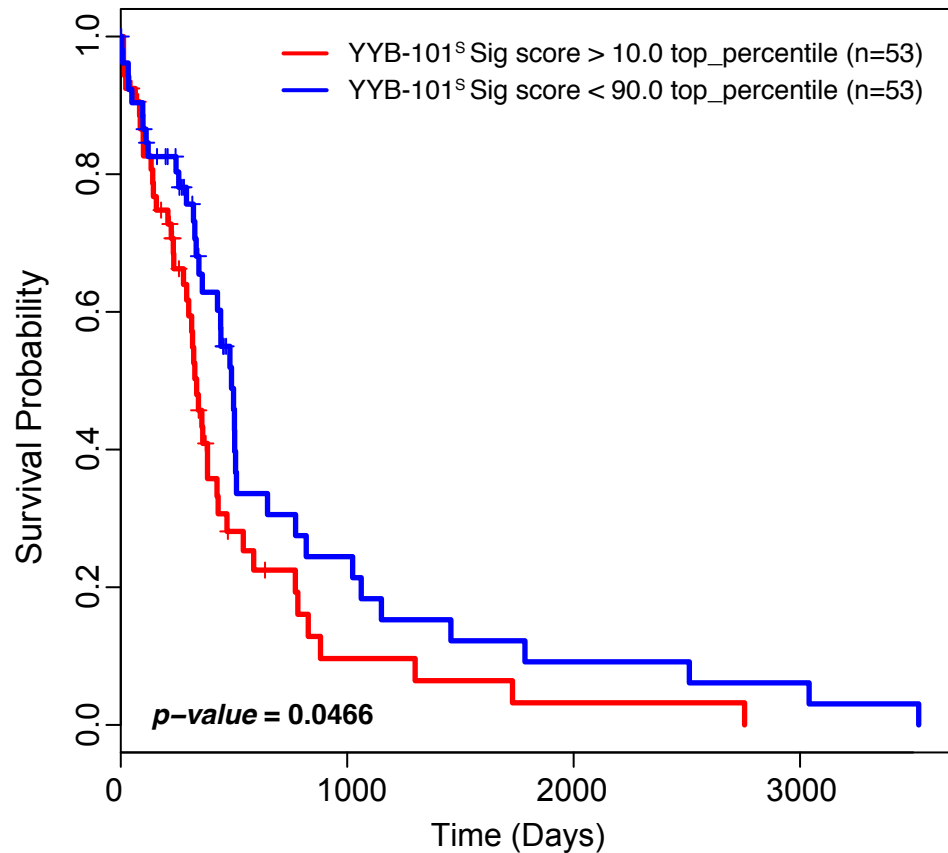

Supplement: noy105_suppl_supplementary_figure_3.pdf [file noy105_suppl_supplementary_figure_3.pdf]

A

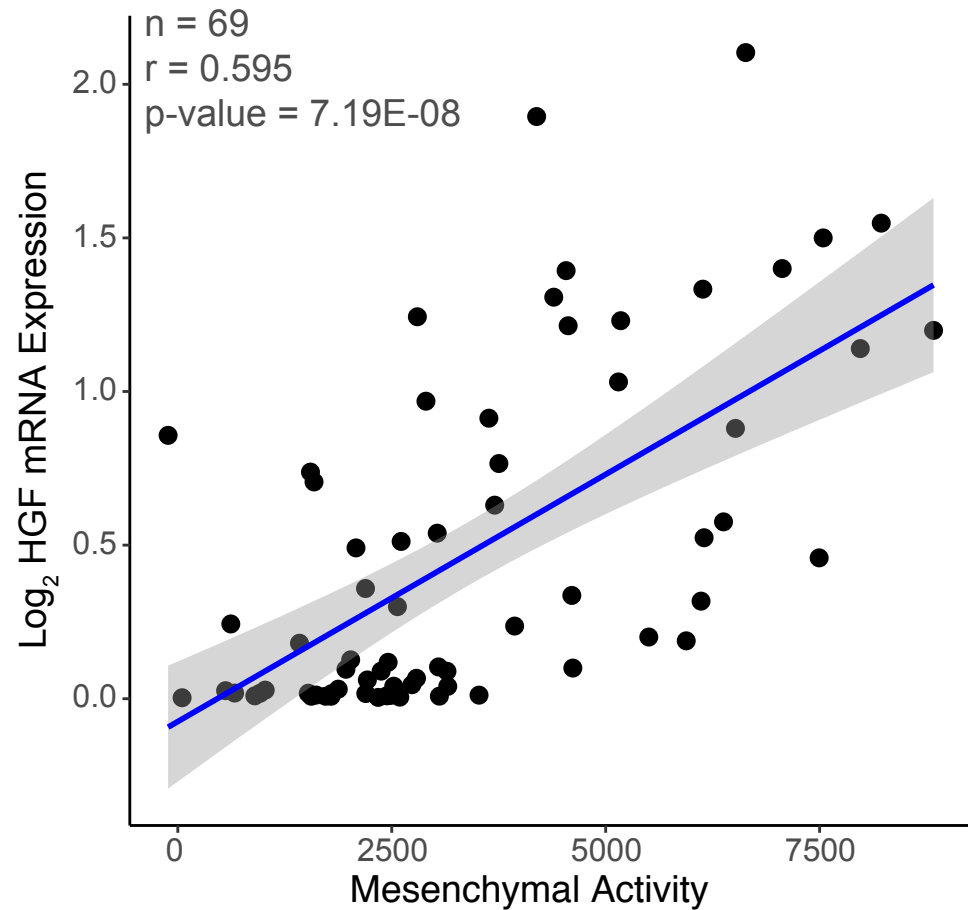

B

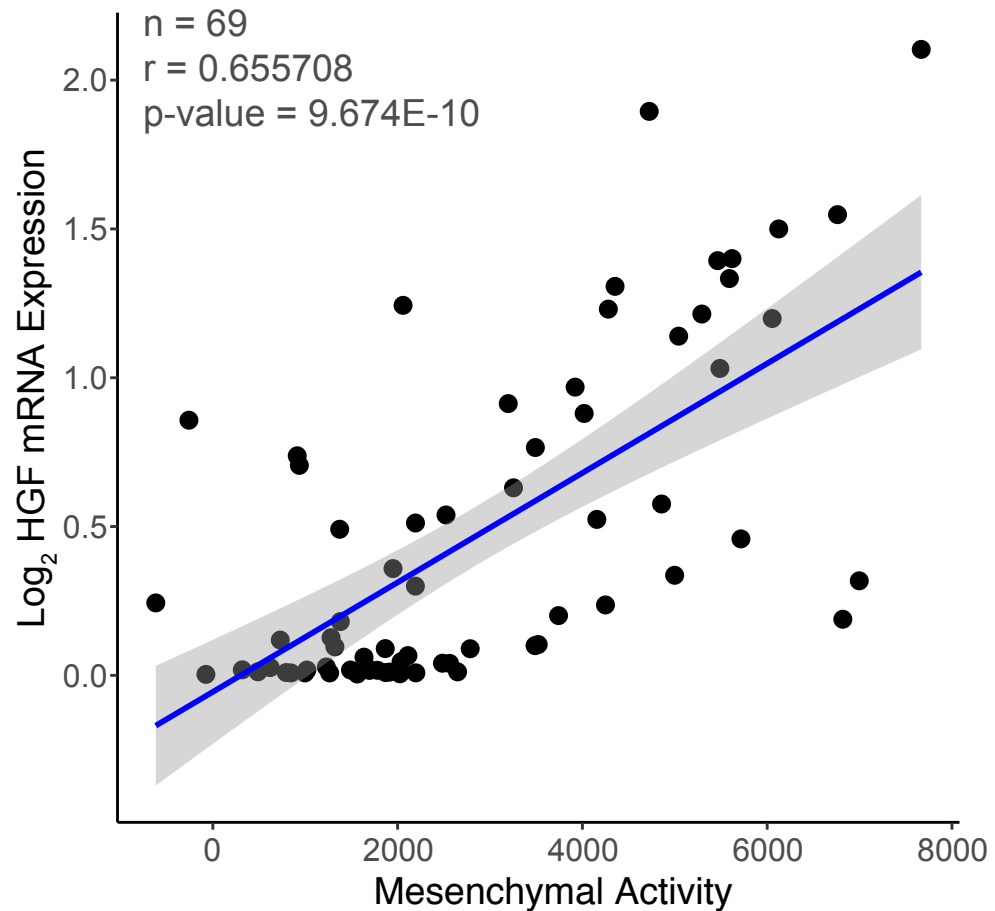

Supplement: noy105_suppl_supplementary_figure_4.pdf [file noy105_suppl_supplementary_figure_4.pdf]
